# Supplementary material for: Structural and Functional Support by Left Atrial Appendage Transplant to the Left Ventricle after a Myocardial Infarction
Source: MDPI journal article supplement (doi:10.3390/ijms23094661), 2022-04-22

# MYOCARDIAL INFARCTION (MI) & LEFT ATRIAL APPENDAGE (LAA) TRANSPLANTATION SURGERY

LAA in cardioplegic solution

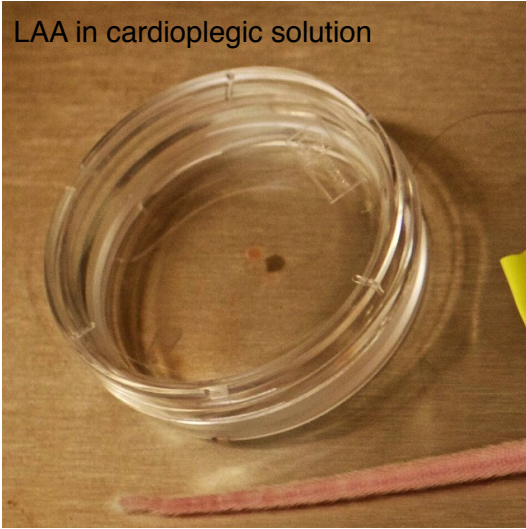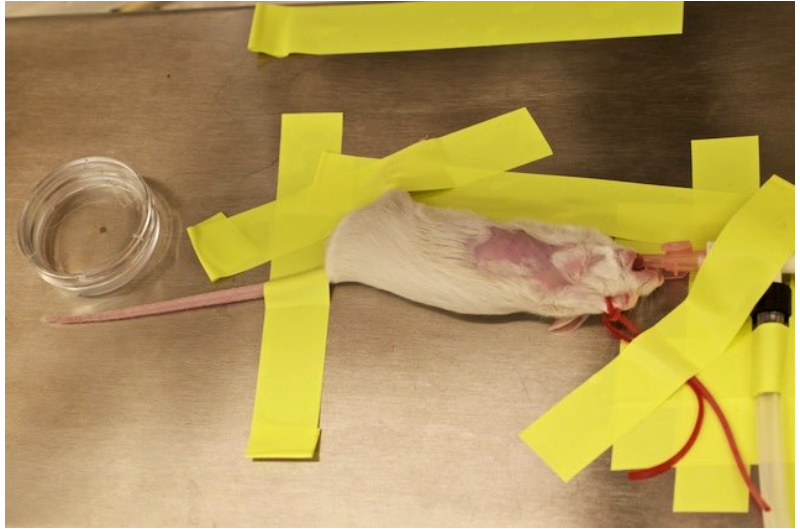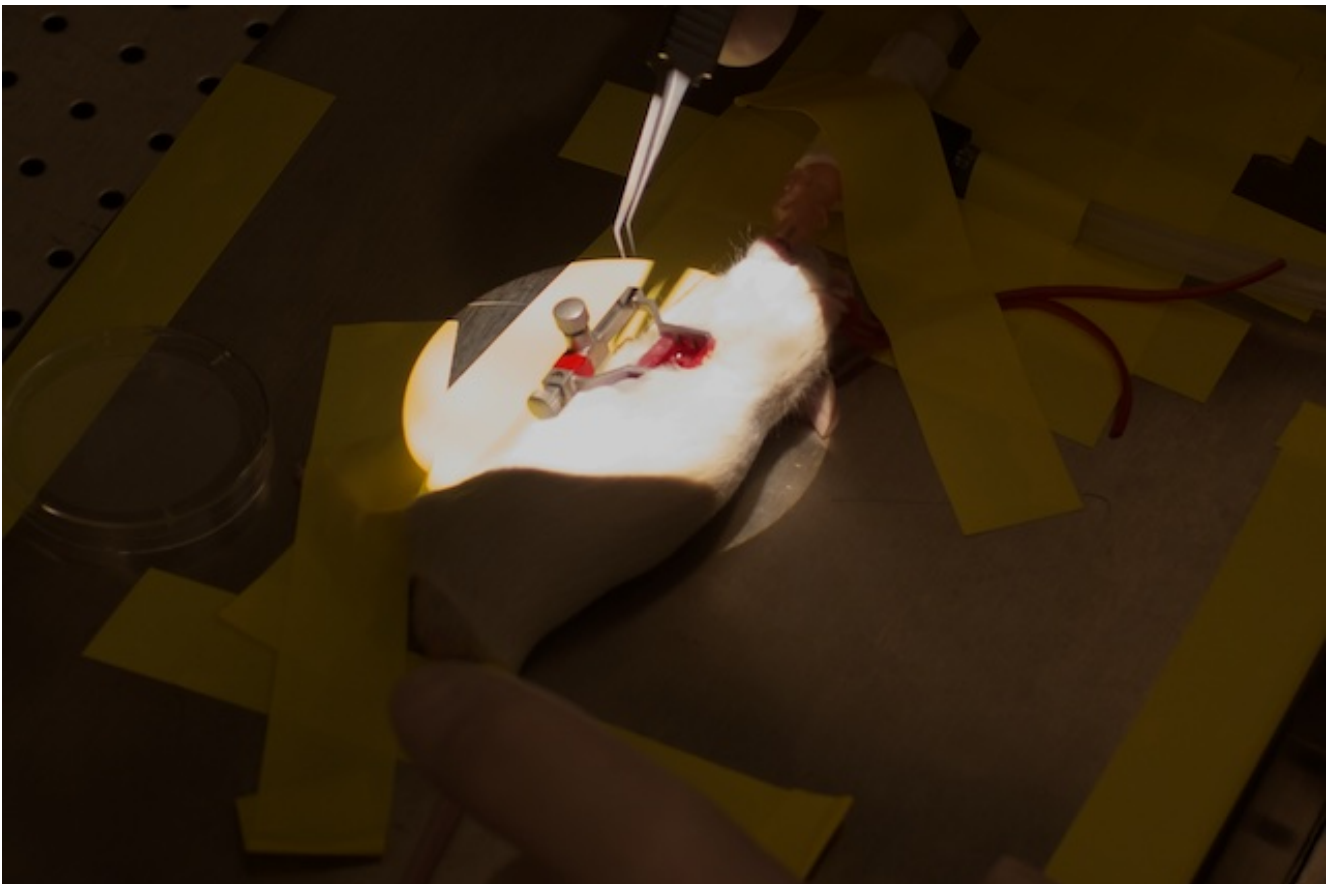

MI

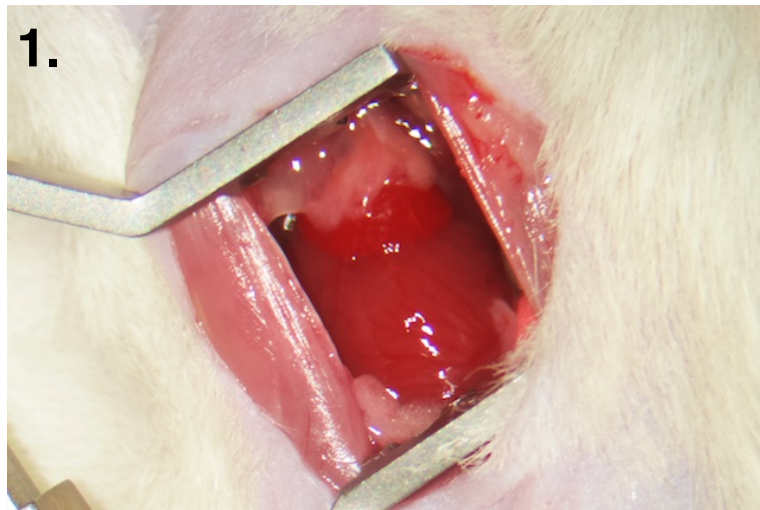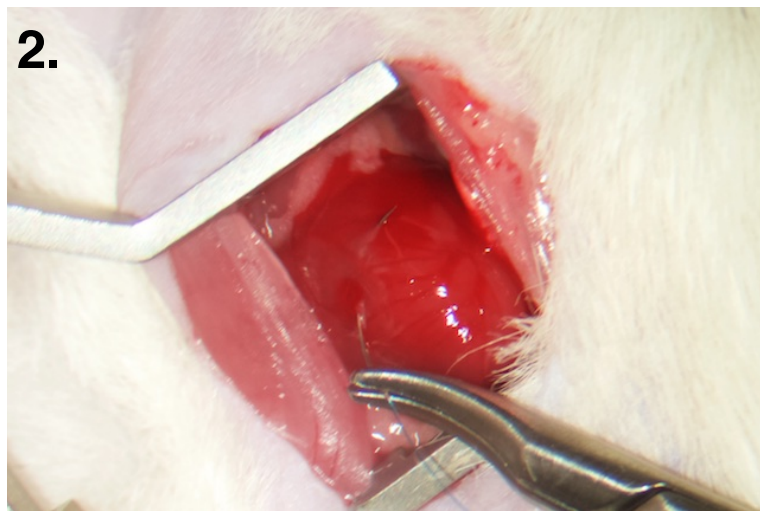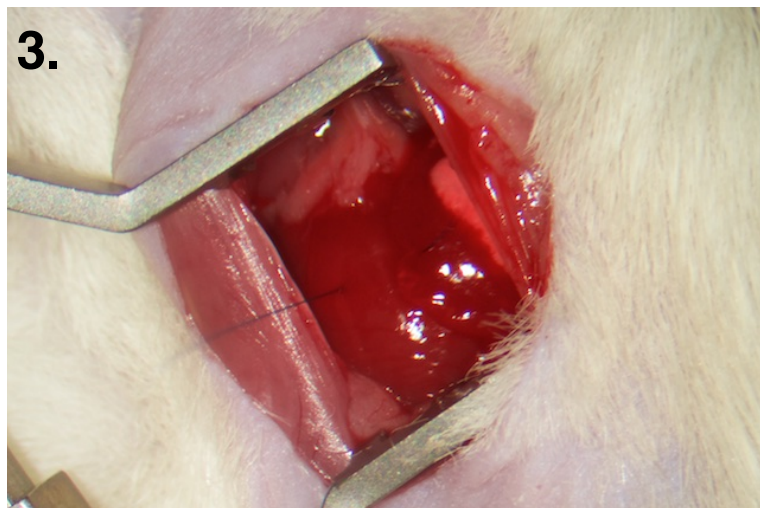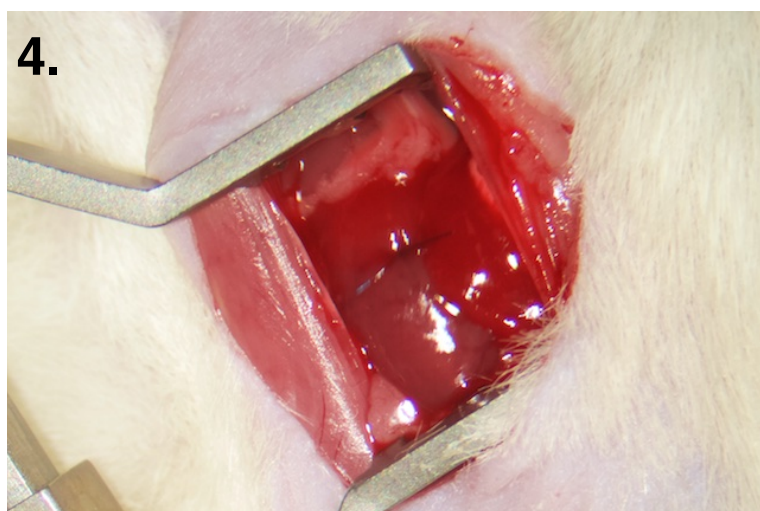

# LAA TRANSPLANT

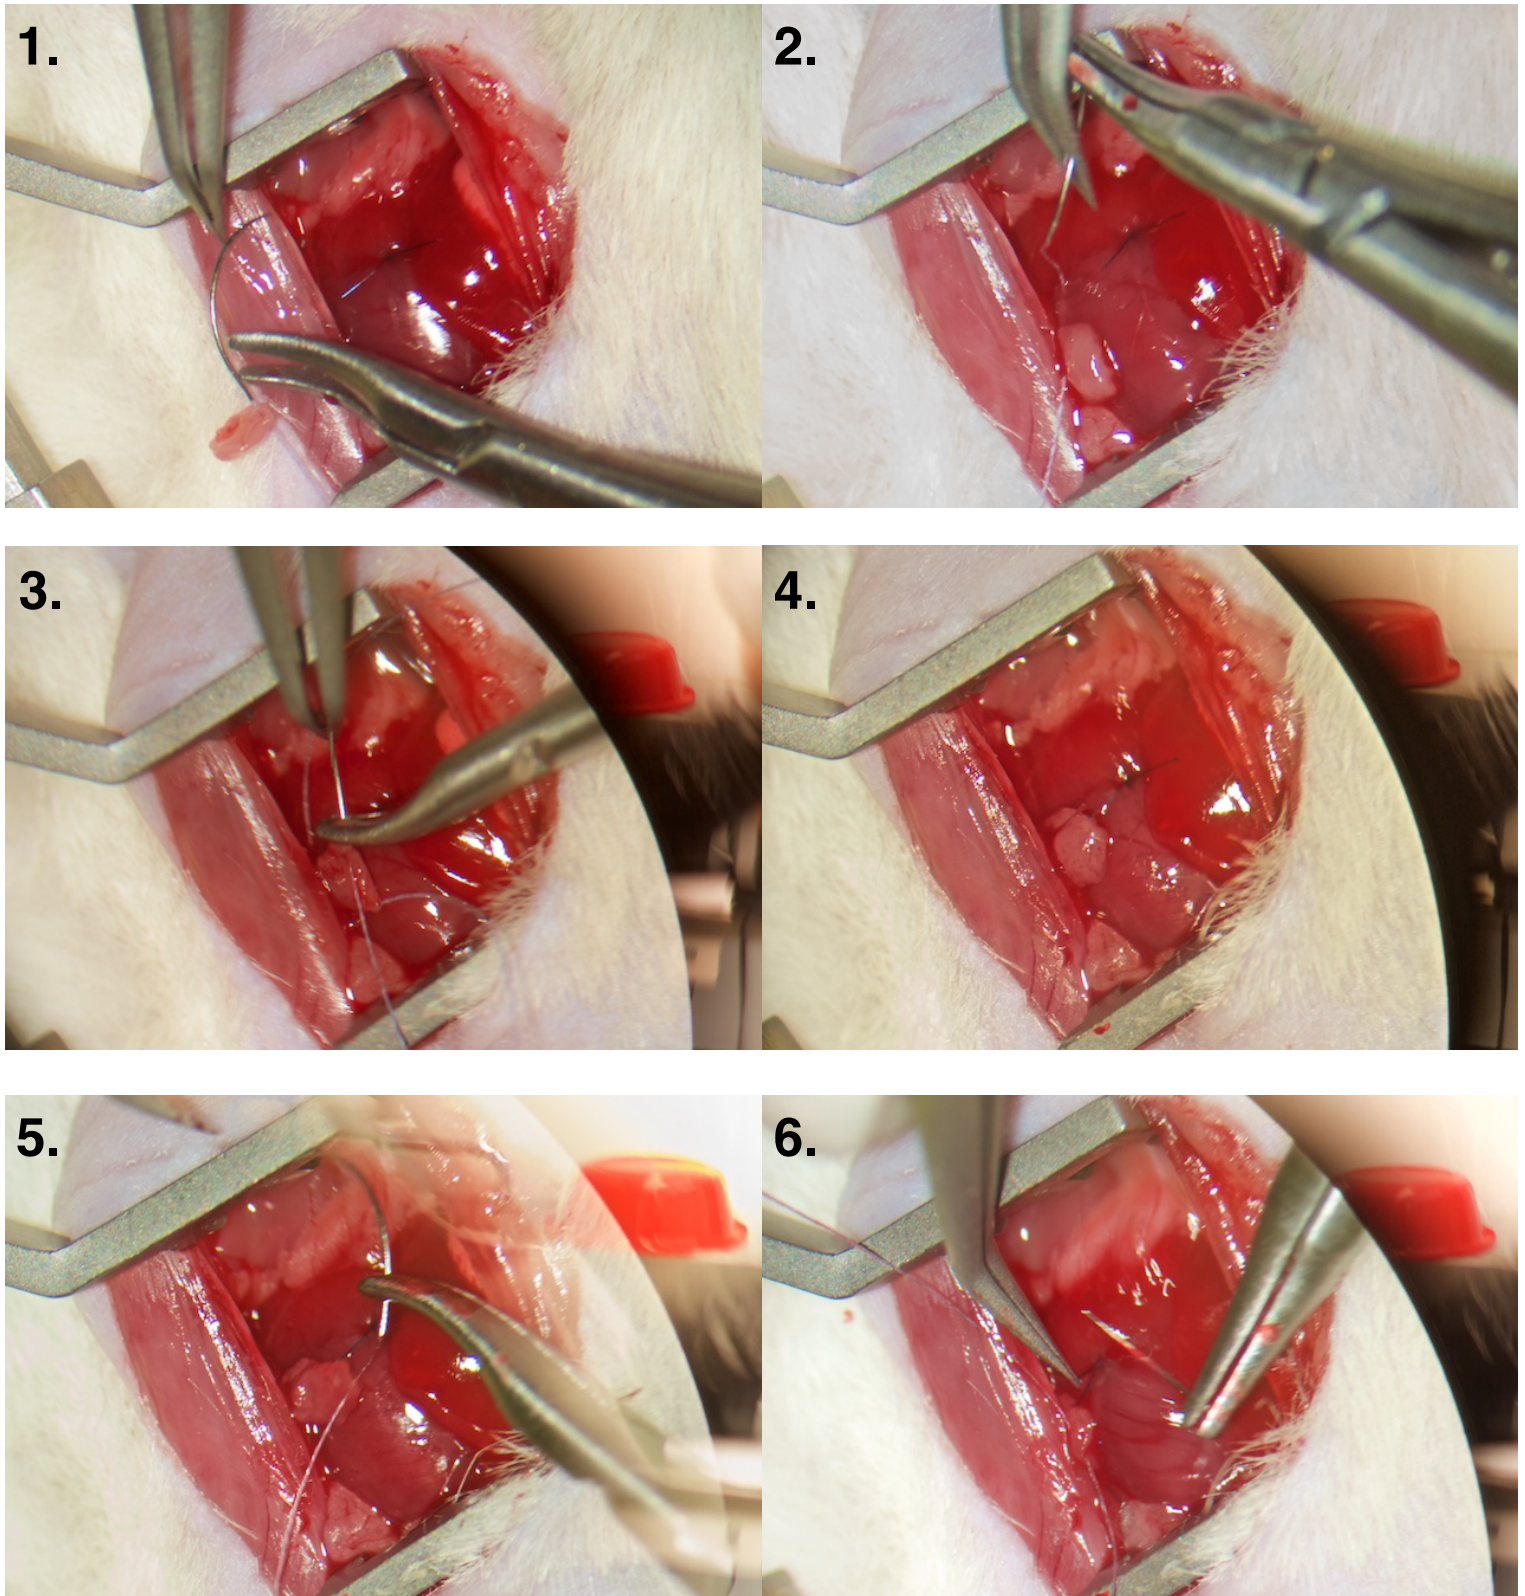

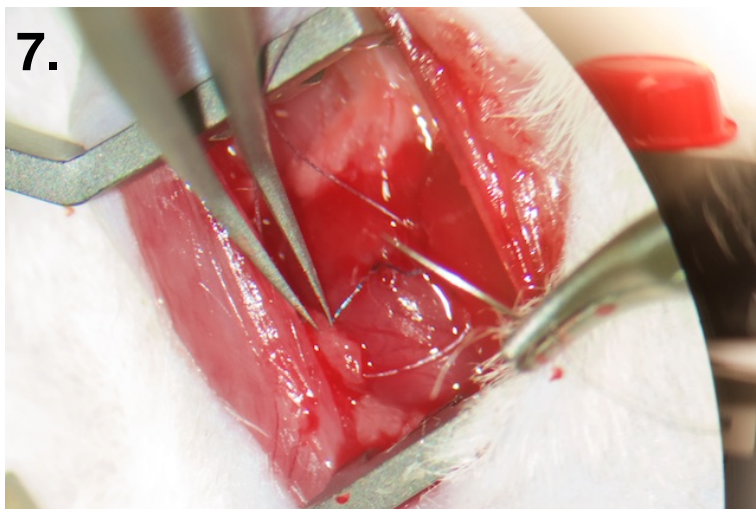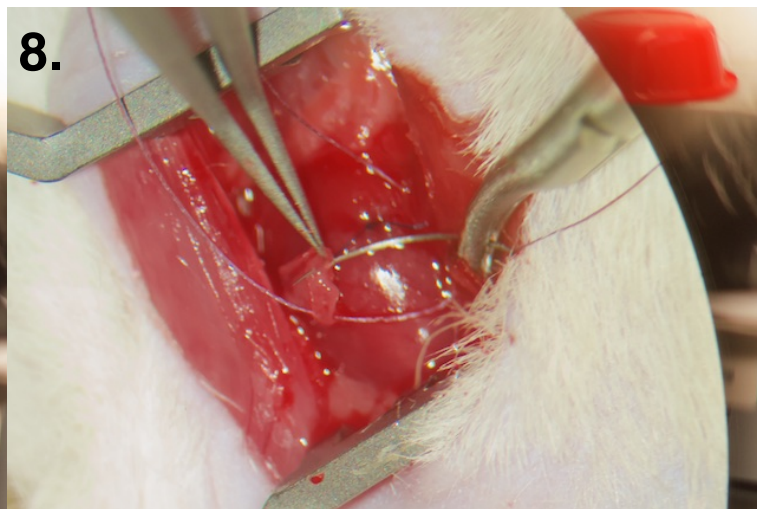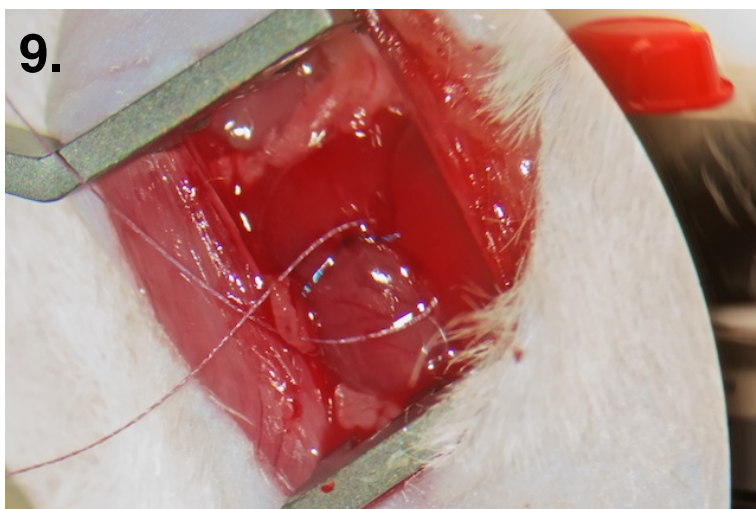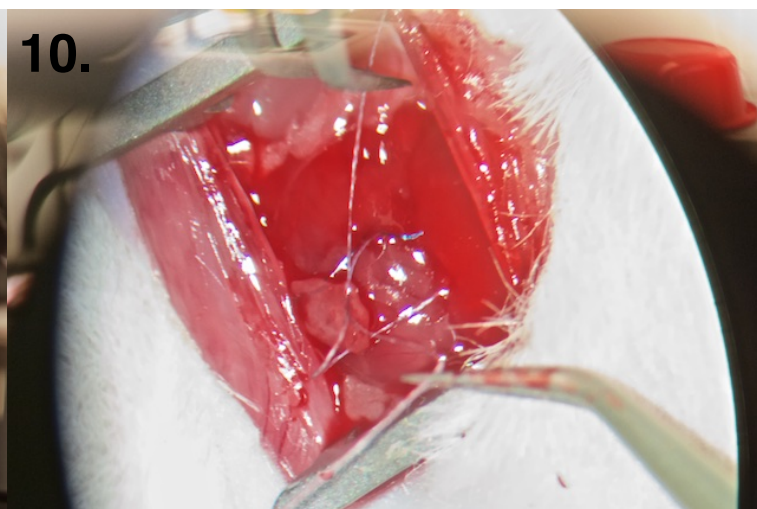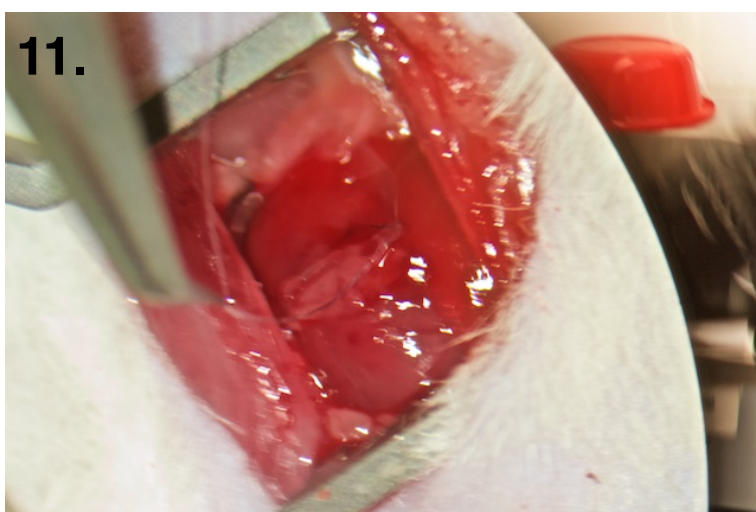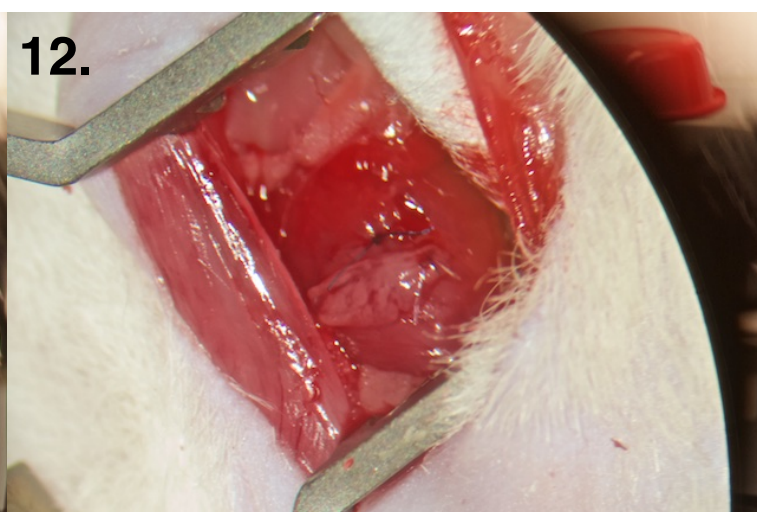

Supplement: s1 [file s1]
